# Supplementary material
Source: Royal Society of Chemistry journal article supplement (doi:10.1039/d6ta01016d)
Supplement: d6ta01016d1.pdf [file d6ta01016d1.pdf]

## Supplementary Material

**Insight into a robust graphdiyne@carbon nanotubes electrode for rapid lithium-ion storage**

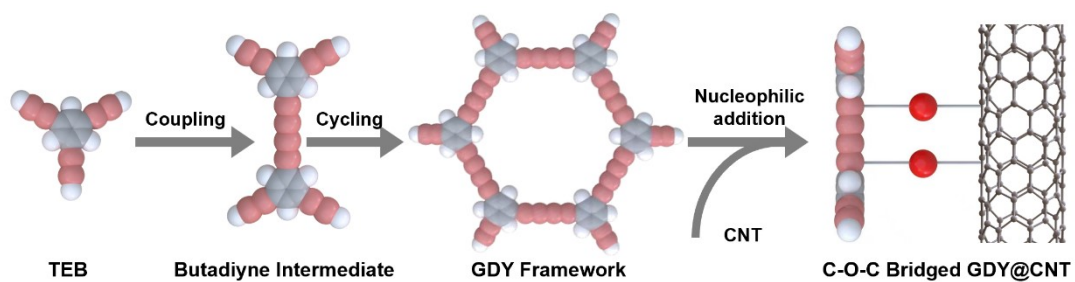

**Fig. S1** Schematic illustration of the formation of bridged GDY@CNT.

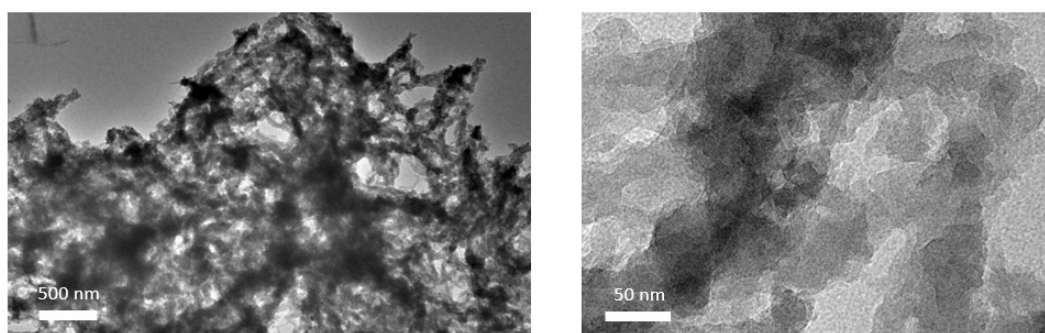

**Fig. S2** TEM images of GDY.

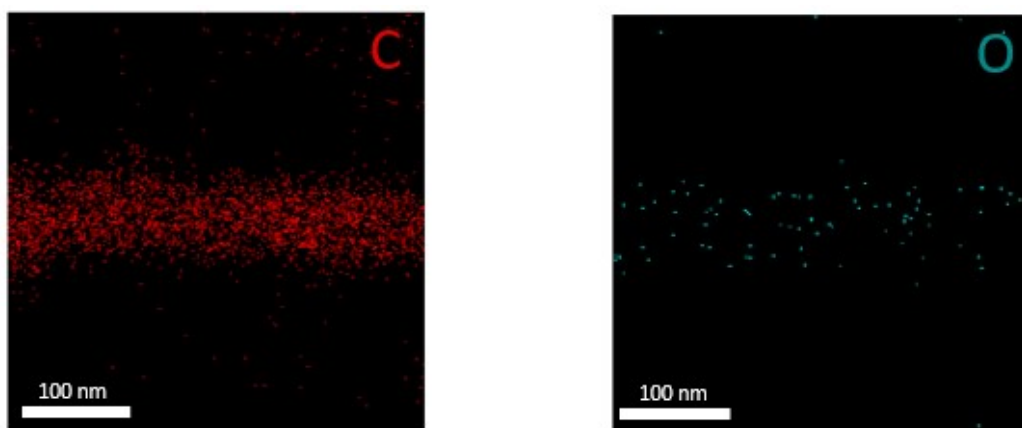

**Fig. S3** EDS mapping of GDY@CNT.

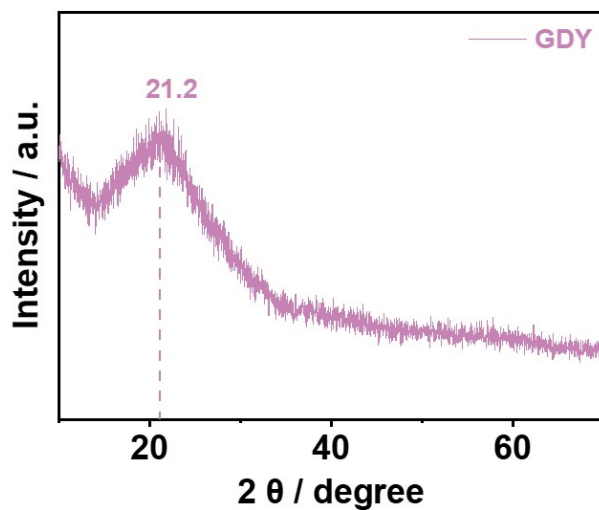

Fig. S4 XRD patterns of GDY.

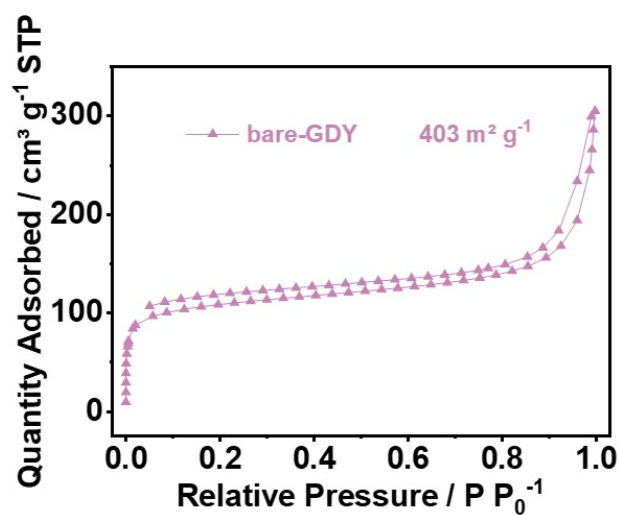

Fig. S5 N<sub>2</sub> adsorption/desorption isotherms of bare-GDY.

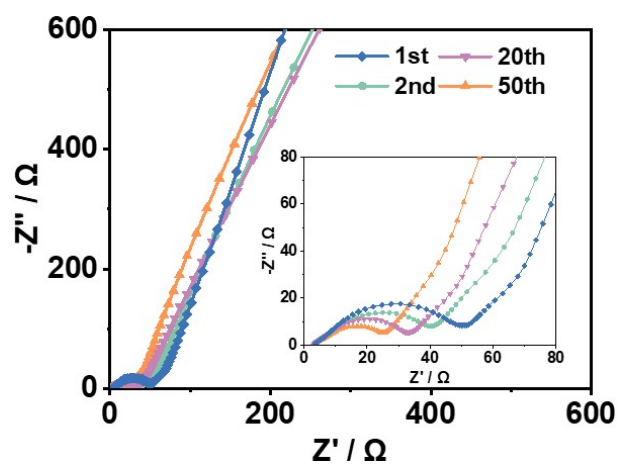

Fig. S6 EIS plots of the GDY electrodes after the 1st to 50th cycles.

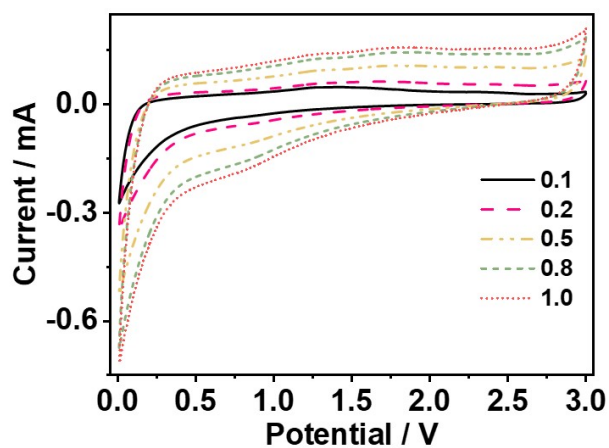

Fig. S7 CV curves of GDY electrode at various scan rates from 0.1 to 1 mV s<sup>-1</sup>.

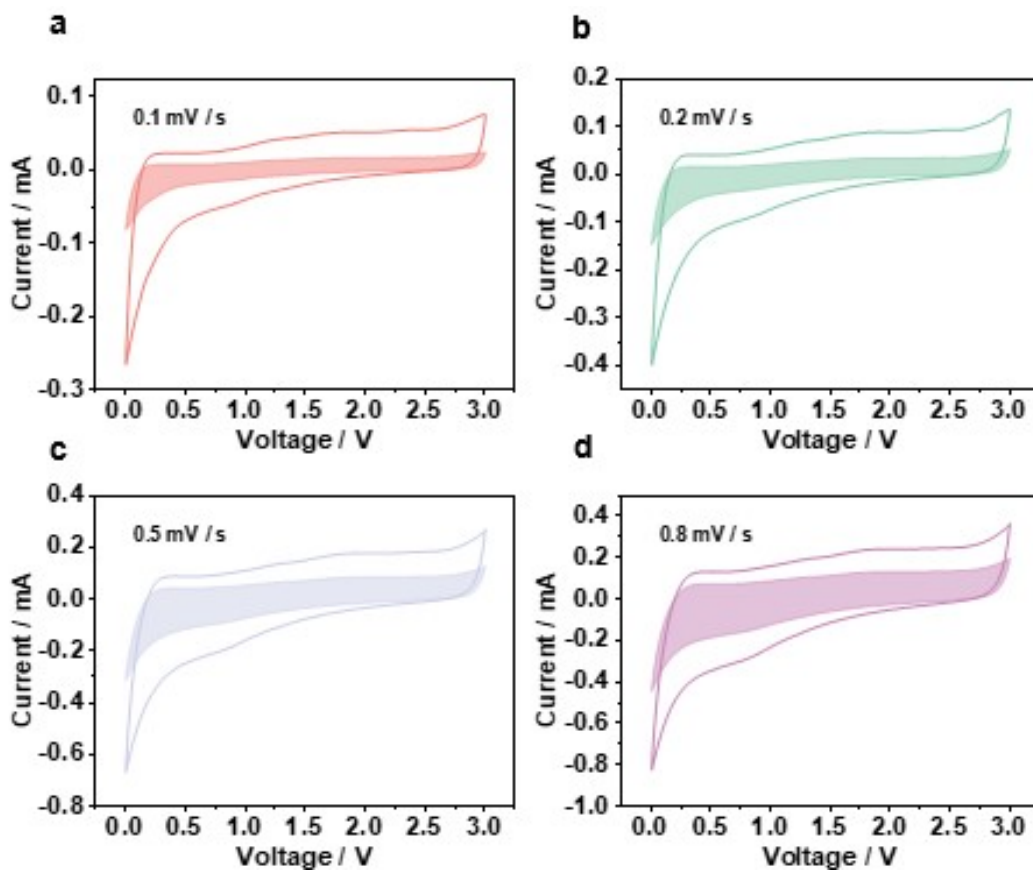

Fig. S8 Pseudocapacitance contribution ratio of GDY@CNT at 0.1 to 0.8 mV s<sup>-1</sup>.

**Table S1.** Comparison of GDY@CNT electrodes for lithium-ion batteries.

| Electrode                                              | Capacity<br>(mA h g <sup>-1</sup> ) | Current density<br>(mA g <sup>-1</sup> ) | Cyclic stability<br>(cycles) | Ref       |
|--------------------------------------------------------|-------------------------------------|------------------------------------------|------------------------------|-----------|
| SiMP                                                   | 400                                 | 1000                                     | 20                           | 1         |
| NPGA                                                   | 195                                 | 1000                                     | 1000                         | 2         |
| HRGO                                                   | 423                                 | 100                                      | 100                          | 3         |
| GNPs                                                   | 414                                 | 1000                                     | 350                          | 4         |
| Activated Carbon                                       | 253                                 | 100                                      | 400                          | 5         |
| MWCNTs                                                 | 300                                 | 25                                       | 40                           | 6         |
| GDYO                                                   | 234.3                               | 100                                      | 200                          | 7         |
| S-Graphdiyne                                           | 275                                 | 500                                      | 500                          | 8         |
| nLTO/SWCNT                                             | 136                                 | 175                                      | 1000                         | 9         |
| CuVO@GDY                                               | 600                                 | 500                                      | 260                          | 10        |
| AN-GDY                                                 | 100                                 | 500                                      | 5000                         | 11        |
| 3DGDY                                                  | 610                                 | 50                                       | 200                          | 12        |
| PQ-GDY@Cu                                              | 570                                 | 200                                      | 900                          | 13        |
| Ti <sub>3</sub> C <sub>2</sub> T <sub>x</sub> /GDYO-5% | 770                                 | 100                                      | 100                          | 14        |
| GDY@CNT                                                | 1017                                | 100                                      | 10                           | This work |
| GDY@CNT                                                | 439                                 | 1000                                     | 600                          | This work |

## References

1. F. Chen, J. Han, D. Kong, Y. Yuan, J. Xiao, S. Wu, D. M. Tang, Y. Deng, W. Lv, J. Lu, F. Kang and Q. H. Yang, *Nat. Sci. Rev.*, 2021, **8**, nwab012.
2. Z. Zuo, D. Wang, J. Zhang, F. Lu and Y. Li, *Adv. Mater.*, 2018, **31**, 1803762.
3. E. Alsharaeh, F. Ahmed, Y. Aldawsari, M. Khasawneh, H. Abuhimd and M. Alshahrani, *Sci. Reports*, 2016, **6**, 29854.
4. Z. I. Ng, Y. L. Leong, H. N. Lim, W. G. Chong and N. M. Huang, *Energy Techno.*, 2024, **12**, 2400512.
5. F. Ahmed, G. Almutairi, P. M. Z. Hasan, S. Rehman, S. Kumar, N. M. Shaalan, A. Aljaafari, A. Alshoaibi, B. AlOtaibi and K. Khan, *Micromachines*, 2023, **14**, 192.

6. Z. Xiong, Y. Yun and H.-J. Jin, *Materials*, 2013, **6**, 1138-1158.
7. T. Wang, M. Li, L. Qi, P. Jie, W. Yang and Y. Li, *Adv. Funct. Mater.*, 2023, **33**, 2308470.
8. F. Kong, Y. Yue, Q. Li and S. Ren, *Nanomaterials*, 2021, **11**, 1161.
9. J. Coelho, A. Pokle, S.-H. Park, N. McEvoy, N. C. Berner, G. S. Duesberg and V. Nicolosi, *Sci. Reports*, 2017, **7**, 7614.
10. F. Wang, J. An, H. Shen, Z. Wang, G. Li and Y. Li, *Angew. Chem. Int. Ed.*, 2023, **135**, e202216397.
11. S.-H. Liu, C.-K. Hu, J.-L. Lu, X. Lu, C.-X. Lu, J. Yao, X.-C. Chen and L. Jiang, *ACS Nano*, 2024, **18**, 9053-9062.
12. J. Li, J. Xu, Z. Xie, X. Gao, J. Zhou, Y. Xiong, C. Chen, J. Zhang and Z. Liu, *Adv. Mater.*, 2018, **30**, 1705448.
13. L. Gao, X. Ge, Z. Zuo, F. Wang, X. Liu, M. Lv, S. Shi, L. Xu, T. Liu, Q. Zhou, X. Ye and S. Xiao, *Nano Lett.*, 2020, **20**, 7333-7341.
14. T. Wang, J. Zhao, L. Qi, G. Li, W. Yang and Y. Li, *Energy Storage Mater.*, 2023, **54**, 10-19.
